# Supplementary material
Source: PubMed Central journal article supplement (PMC7658687)

# Figure S3

## Patient Data

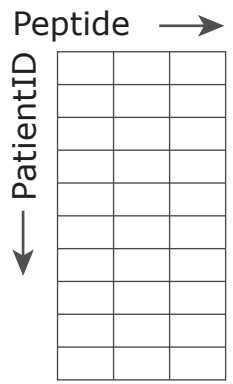

300 Monte Carlo Experiments

## Bagging Procedure

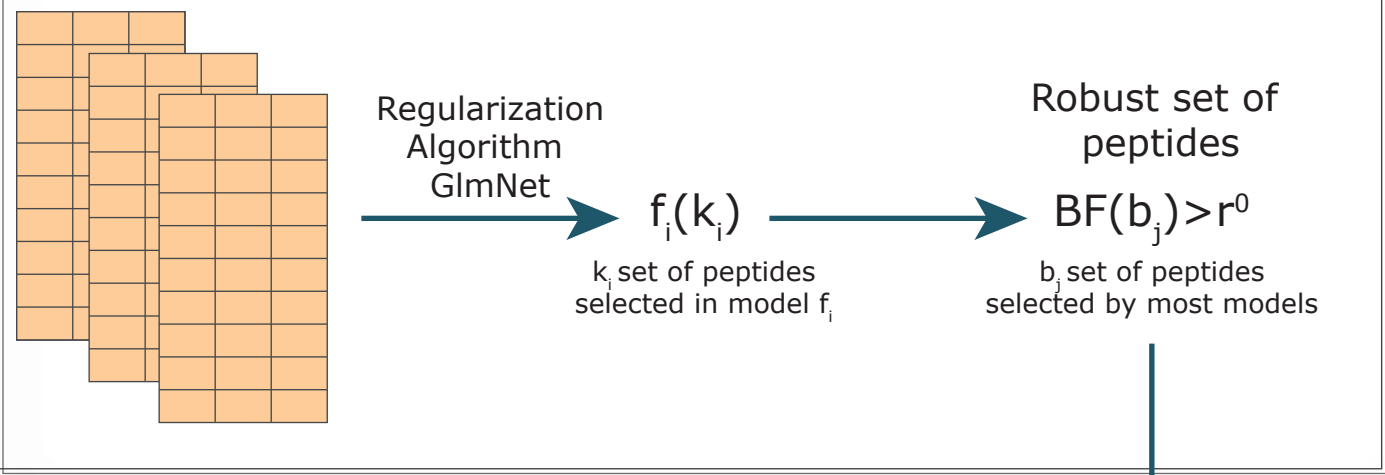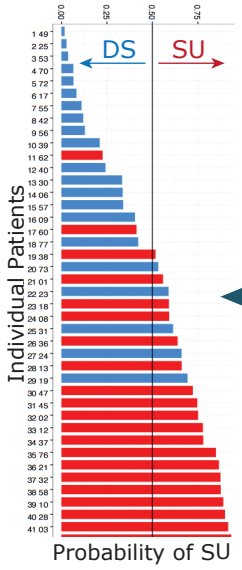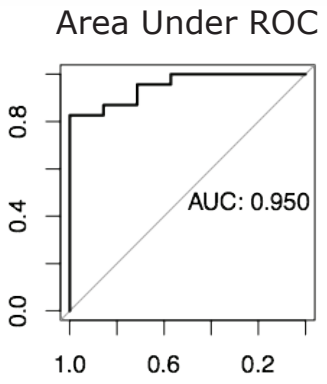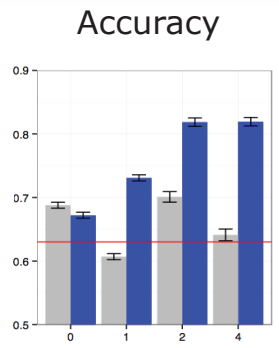

Model performance ←

Fit a model starting with  $b_j$  independent predictors

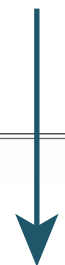

Supplement: NIHMS1516290-supplement-3.pdf [file NIHMS1516290-supplement-3.pdf]
