# Supplementary material
Source: PubMed Central journal article supplement (PMC7658687)
Supplement: NIHMS1516290-supplement-6.pdf [file NIHMS1516290-supplement-6.pdf]

# Figure S6

MOIT Outcome

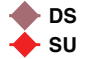

## A Epitope Diversity

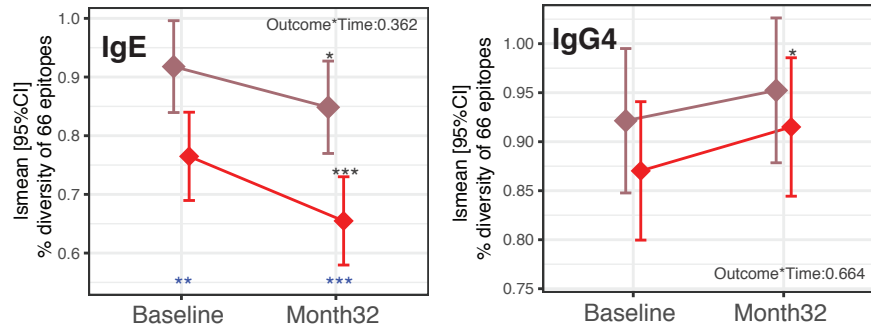

## C Epitope Binding Z-score

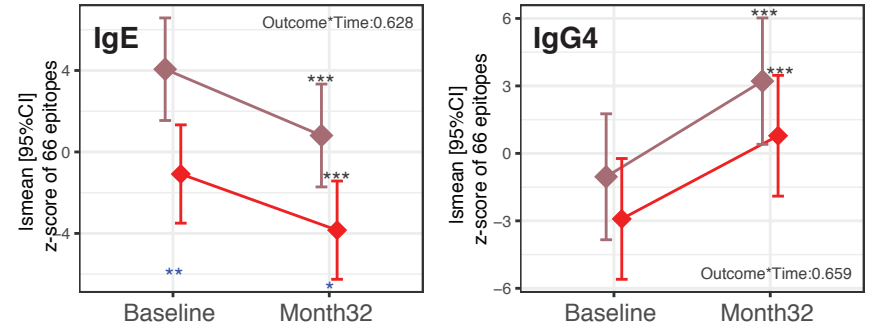

## B Epitope Diversity by Protein

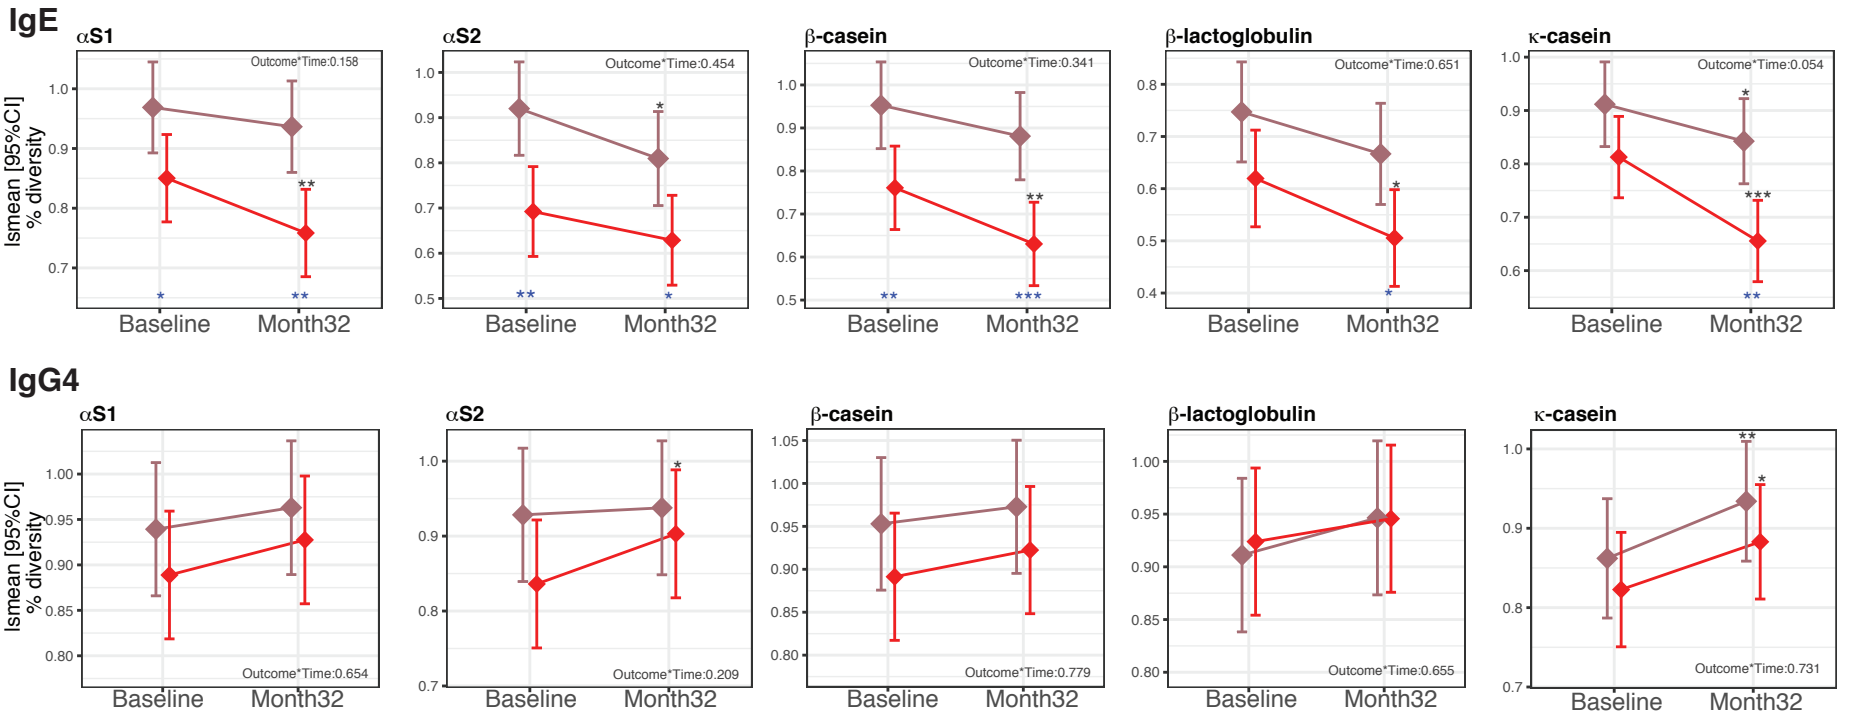

\* $P < .05$ , \*\* $P < .01$ , \*\*\* $P < .001$
