# Supplementary material
Source: PubMed Central journal article supplement (PMC7658687)

# Figure S1

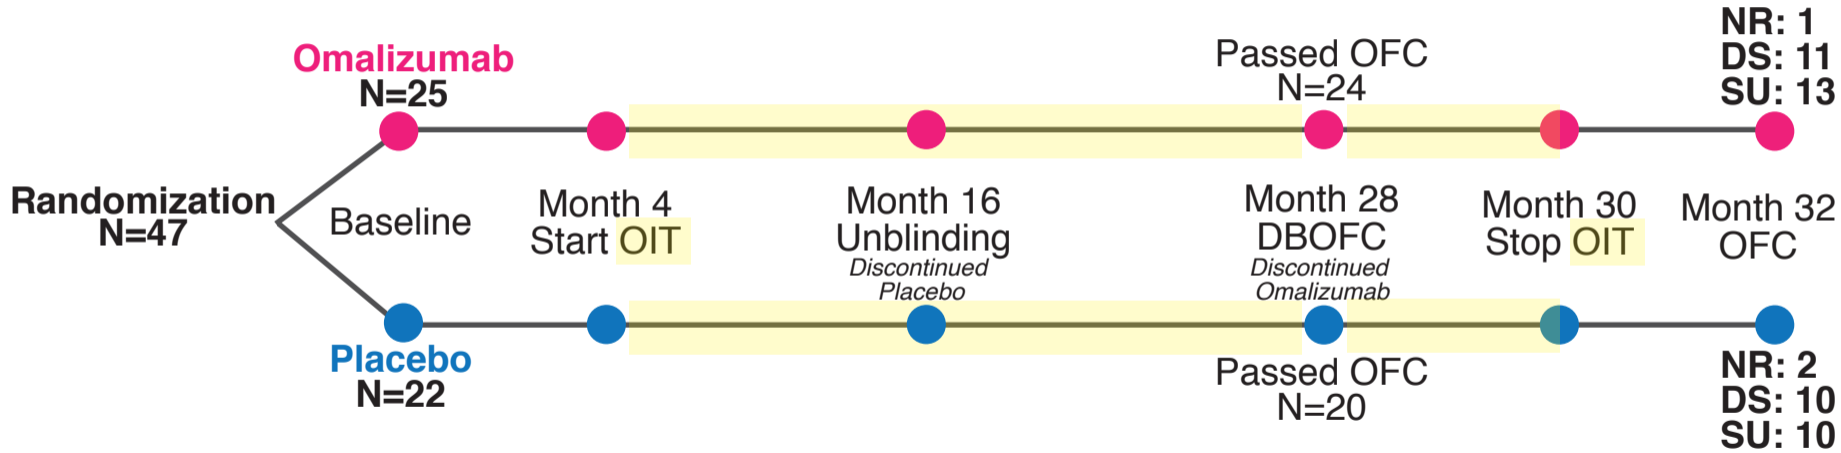

Supplement: NIHMS1516290-supplement-1.pdf [file NIHMS1516290-supplement-1.pdf]

# Figure S2

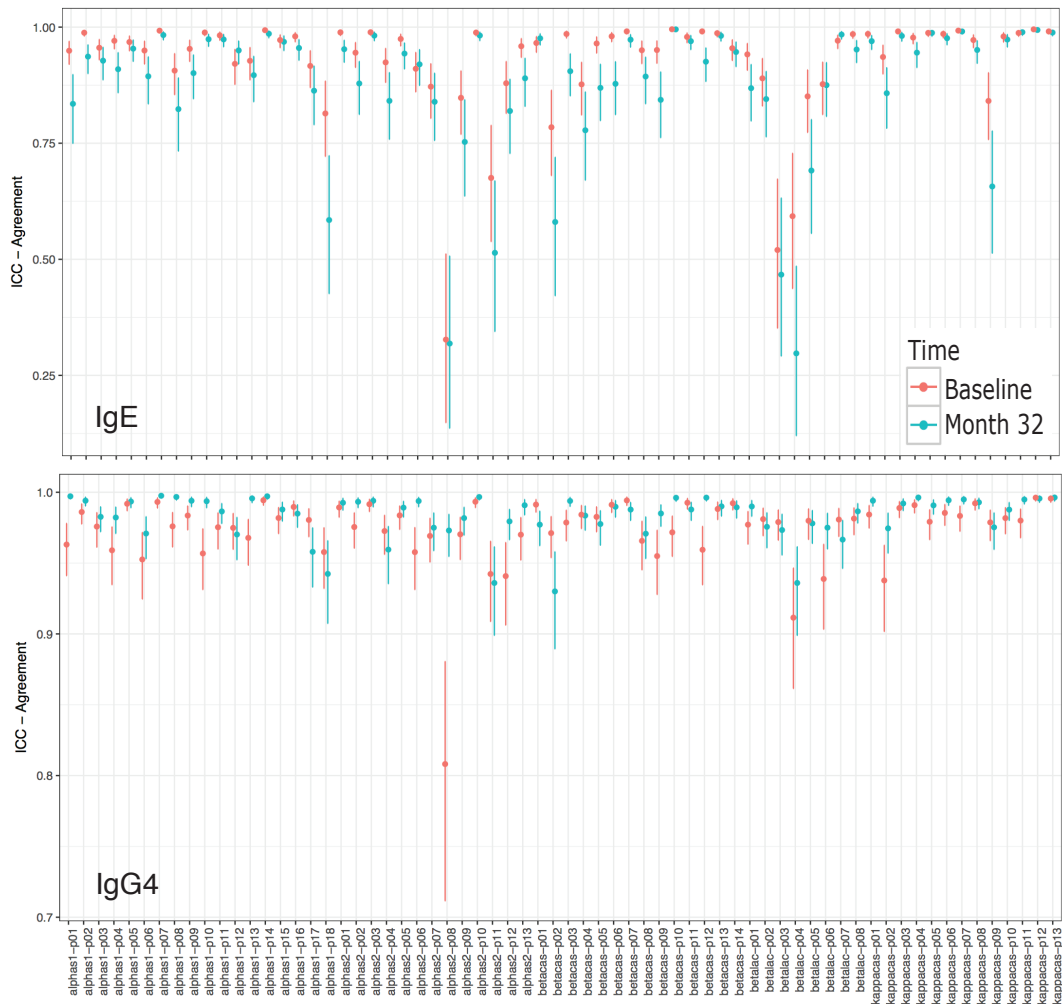

Supplement: NIHMS1516290-supplement-2.pdf [file NIHMS1516290-supplement-2.pdf]

# Figure S4

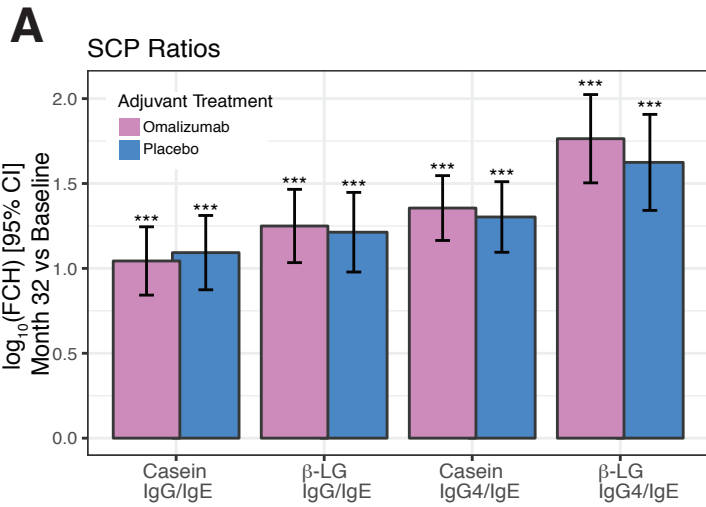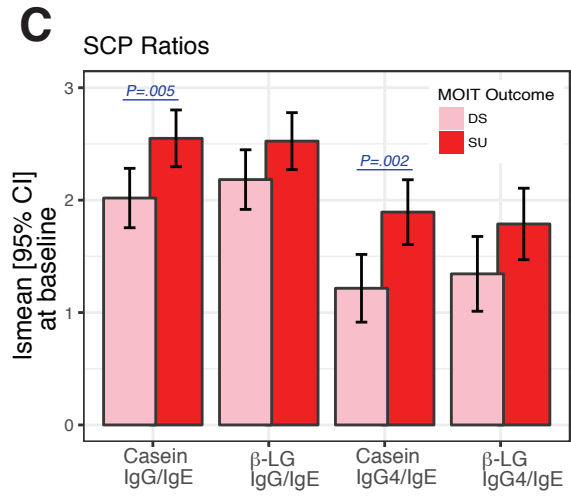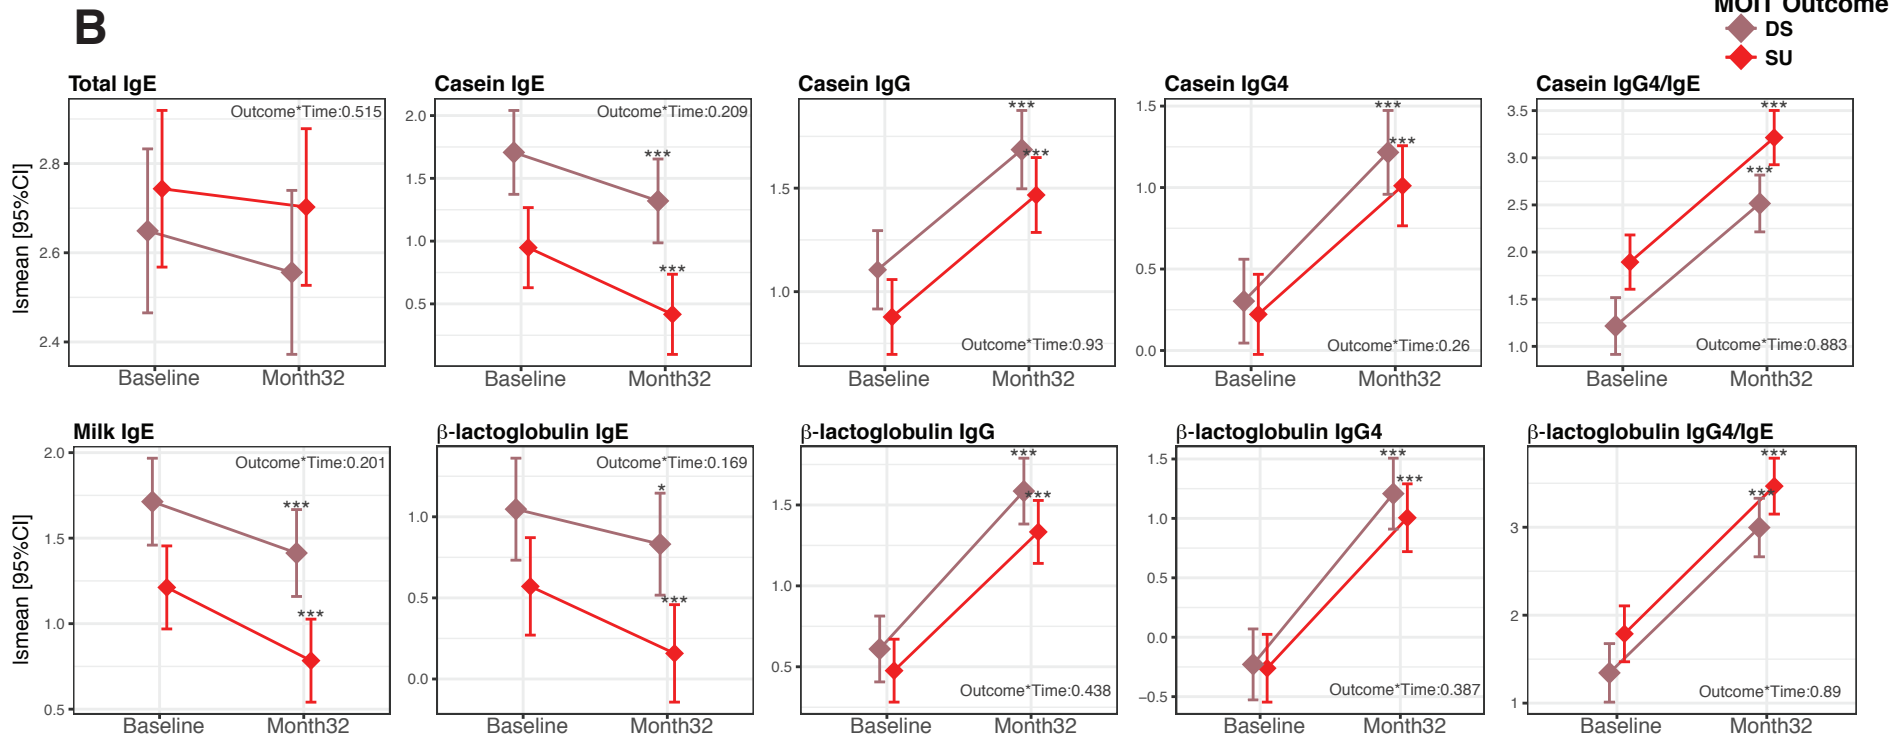

\* $P < .05$ , \*\* $P < .01$ , \*\*\* $P < .001$

Supplement: NIHMS1516290-supplement-4.pdf [file NIHMS1516290-supplement-4.pdf]

# Figure S5

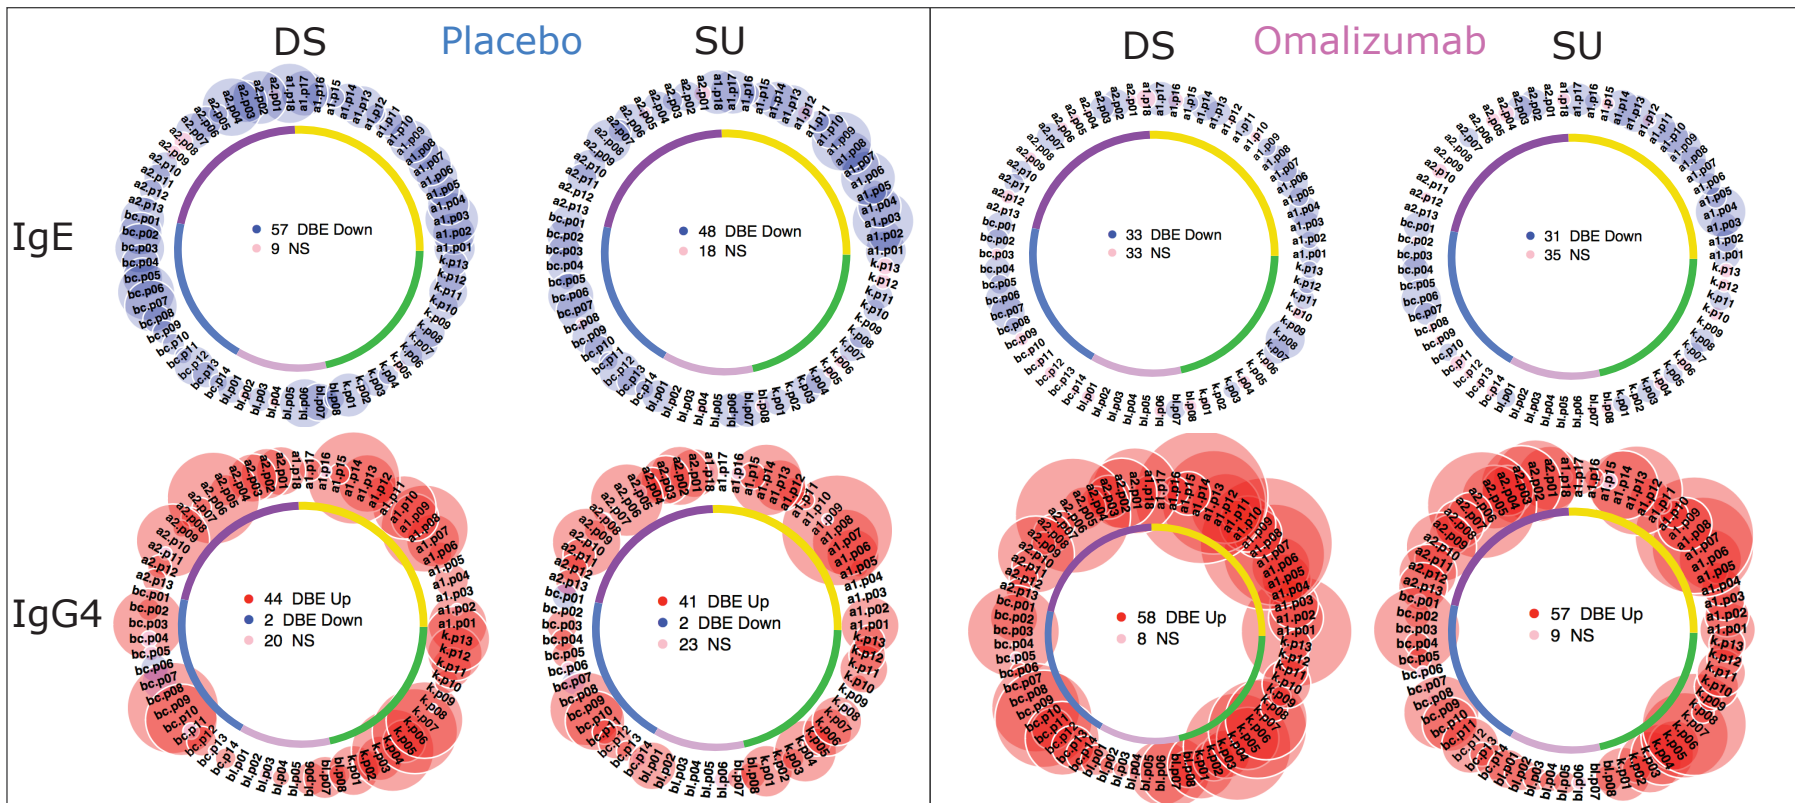

Supplement: NIHMS1516290-supplement-5.pdf [file NIHMS1516290-supplement-5.pdf]

# Figure S7

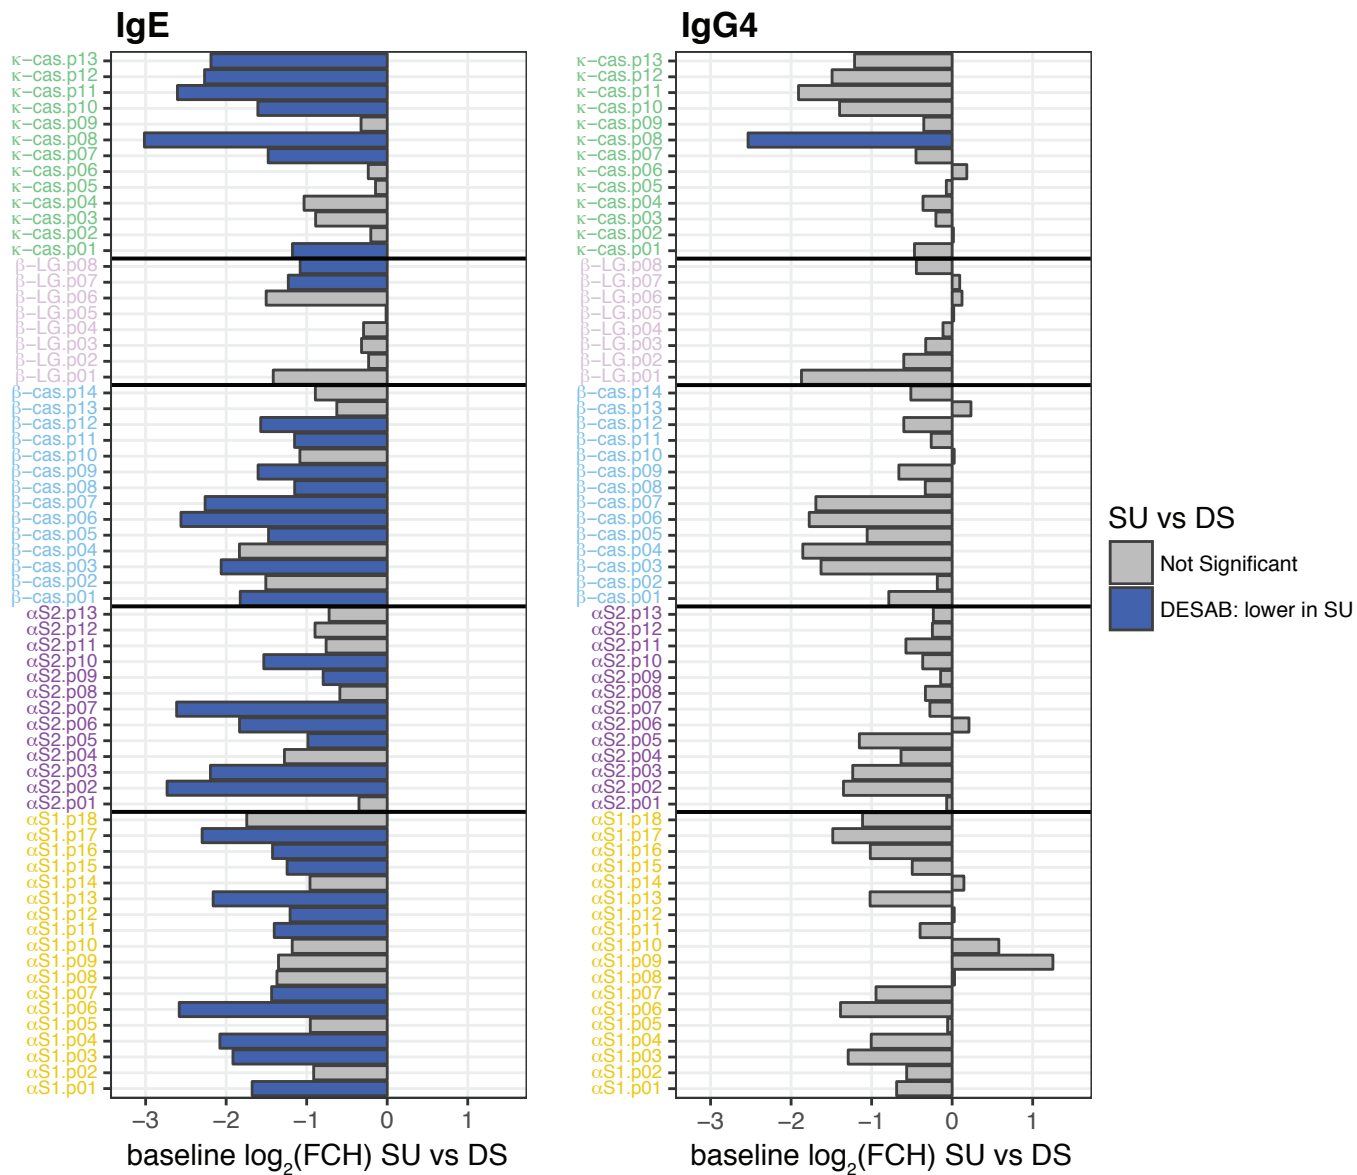

Supplement: NIHMS1516290-supplement-7.pdf [file NIHMS1516290-supplement-7.pdf]

# Figure S8

## A Performance in Bootstrap (n=300)

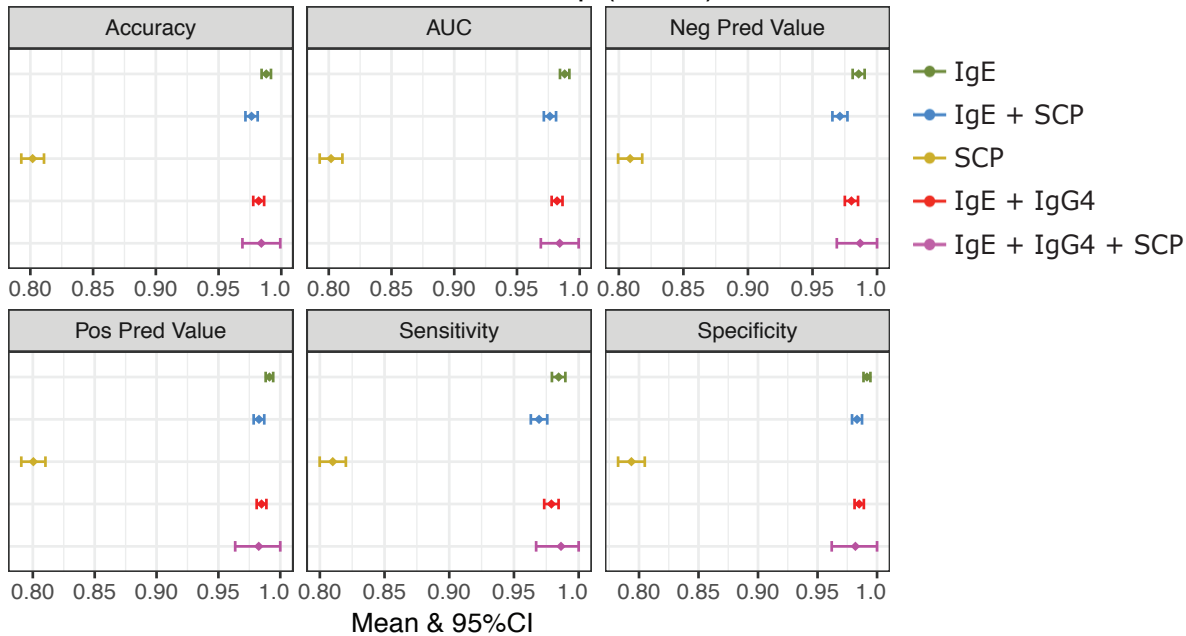

## B CV - Accuracy

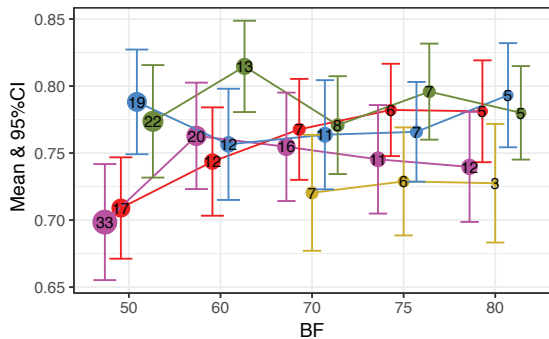

## C CV Accuracy - Coefficient of Variation

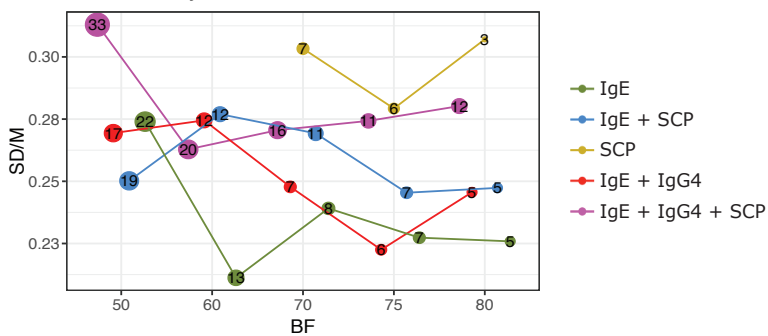

Supplement: NIHMS1516290-supplement-8.pdf [file NIHMS1516290-supplement-8.pdf]
